# Supplementary material for: Implications of evolutionary engineering for growth and recombinant protein production in methanol-based growth media in the yeast Pichia pastoris
Source: PubMed Central journal article supplement (PMC5356285; doi:10.1186/s12934-017-0661-5), 2017-03-17
Supplement: 12934_2017_661_MOESM1_ESM.pdf [file 12934_2017_661_MOESM1_ESM.pdf]

# Implications of evolutionary engineering for growth and recombinant protein production in methanol-based growth media in the yeast *Pichia pastoris*

Josef W. Moser<sup>1,2</sup>, Roland Prielhofer<sup>2,3</sup>, Samuel M. Gerner<sup>4</sup>, Alexandra B. Graf<sup>2,4</sup>, Iain B.H. Wilson<sup>1</sup>, Diethard Mattanovich<sup>2,3</sup> and Martin Dragosits<sup>1\*</sup>

<sup>1</sup> University of Natural Resources and Life Sciences, Vienna, Department of Chemistry

<sup>2</sup> Austrian Centre of Industrial Biotechnology (ACIB) 1190 Vienna, Austria

<sup>3</sup> University of Natural Resources and Life Sciences, Vienna, Department of Biotechnology

<sup>4</sup> University of Applied Sciences FH-Campus Wien, Bioengineering, Vienna

[josef.moser@acib.at](mailto:josef.moser@acib.at)

[roland.prielhofer@boku.ac.at](mailto:roland.prielhofer@boku.ac.at)

[samuel.gerner@fh-campuswien.ac.at](mailto:samuel.gerner@fh-campuswien.ac.at)

[alexandra.graf@fh-campuswien.ac.at](mailto:alexandra.graf@fh-campuswien.ac.at)

[diethard.mattanovich@boku.ac.at](mailto:diethard.mattanovich@boku.ac.at)

[iain.wilson@boku.ac.at](mailto:iain.wilson@boku.ac.at)

[martin.dragosits@boku.ac.at](mailto:martin.dragosits@boku.ac.at)

## Additional Information

\* corresponding author contact information: Martin Dragosits, University of Natural Resources and Life Sciences, Vienna, Department of Chemistry. Muthgasse 11, 1190 Vienna, Austria. Tel. +431 476547722, e-mail: [martin.dragosits@boku.ac.at](mailto:martin.dragosits@boku.ac.at)

## Additional Tables

| name                    | primer 5'3'                                           | purpose               |
|-------------------------|-------------------------------------------------------|-----------------------|
| NGS_PAS_chr4_0821 fw    | ATCATCATTATTAGCTTACTTTCA                              | mutation verification |
| NGS_PAS_chr4_0821 rv    | AATCTTCTGTACTCTGAAGAGG                                | mutation verification |
| NGS_PAS_chr4_0821 ig    | ACTTGTTACTGCTCACGGTGC                                 | mutation verification |
| NGS_PAS_chr2-1_0455 fw  | ATGCCTAAAGCTACAAAGAAGA                                | mutation verification |
| NGS_PAS_chr2-1_0455 rv  | GGGAACAAATTCATTAACATTGAA                              | mutation verification |
| NGS_PAS_chr2-1_0455 ig  | TCCGCTGCATTGAAATACGCAG                                | mutation verification |
| NGS_PAS_chr3_0836 fw    | ATGAGTACCGCAGCCCCAATCA                                | mutation verification |
| NGS_PAS_chr3_0836 rv    | TTCTTCAACATTCCAGTAGTCA                                | mutation verification |
| NGS_PAS_chr3_1001 fw    | ATGTCGTACAACAGACCATTGC                                | mutation verification |
| NGS_PAS_chr3_1001 rv    | AGTCCACTTCCAGATTCTGGCT                                | mutation verification |
| NGS_PAS_chr3_0512 fw    | ATGCAGTACGTAGGTAGAGCCA                                | mutation verification |
| NGS_PAS_chr3_0512 rv    | GCTGTCATCGATTCTCATTTTG                                | mutation verification |
| NGS_PAS_chr3_0512 ig    | AATGGTGCCATATCTTTGTTGA                                | mutation verification |
| NGS_PAS_chr3_0956 fw    | ATGTCTACCAATGAACATCAAT                                | mutation verification |
| NGS_PAS_chr3_0956 rv    | TTCTCTAGAGTTCACCACTTGA                                | mutation verification |
| NGS_PAS_chr2-1_0162 fw  | ATGACAGAACTACTGGAGTTGC                                | mutation verification |
| NGS_PAS_chr2-1_0162 rv  | TTCGGGACTCGACTCGGCGATT                                | mutation verification |
| NGS_PAS_chr2-1_0162 ig  | CTTCAAACTTTTGCCCTGGAA                                 | mutation verification |
| NGS_ig_PAS_chr3_0857 fw | AAATCGATGTGGCACATGTCAA                                | mutation verification |
| NGS_ig_PAS_chr3_0857 rv | CTTTATAAATGTAATTGATAAT                                | mutation verification |
| NGS_PAS_chr4_0108 fw    | ATGTCAGAAGAGTCTCCAATTG                                | mutation verification |
| NGS_PAS_chr4_0108 rv    | AAACTCGTCAGAGTTTGAACA                                 | mutation verification |
| NGS_36948_fw            | ATGAAACAACACTACTCAGAGAAG                              | mutation verification |
| NGS_36948_rv            | CATCTTGAGCTTTCTTTTCTGA                                | mutation verification |
| NGS_PAS_chr1-4_0181 fw  | ATGGACCCCACAAACGATCCCA                                | mutation verification |
| NGS_PAS_chr1-4_0181 rv  | ATCGGCTTTGTCGCCATAACT                                 | mutation verification |
| PAS_ch2-1_0455 fw       | ACAACTATTTTCAAACGAGGAATTCATGCCTAAAGCTACAAAGA          | pGAPzB cloning        |
| PAS_ch2-1_0455 rv       | GTTTTTGttcTAGAAAGCTGGCGCCGCTTAGGGAAACAAATTCATTAACATTG | pGAPzB cloning        |

**Additional Table 1. Oligonucleotides used in the current study;** For PCR reactions to verify Illumina results and cloning of open reading frame PAS\_chr2-1\_0455.

| population  | generations per day | total generations | Total estimated CCD |
|-------------|---------------------|-------------------|---------------------|
| X-33 Y250 1 | 4.32                | 249.4             | $10^{10.01}$        |
| X-33 Y250 2 | 4.31                | 249.0             | $10^{10.02}$        |
| X-33 Y250 3 | 4.31                | 249.4             | $10^{9.96}$         |
| X-33 Y250 4 | 4.32                | 250.3             | $10^{9.99}$         |
| X-33 M250 1 | 3.35                | 251.3             | $10^{9.63}$         |
| X-33 M250 2 | 3.37                | 252.4             | $10^{9.63}$         |
| X-33 M250 3 | 3.40                | 254.4             | $10^{9.69}$         |
| X-33 M250 4 | 3.34                | 251.2             | $10^{9.60}$         |

**Additional Table 2. Summary of the long-term adaptation experiment.** Daily Generations were calculated based on daily duplicate OD<sub>600</sub> measurements for each population yielding a total of approximately 250 generations. The cumulative number of cell divisions (CCD) was calculated as described in the material and methods section of the main manuscript.

| <b>p-values</b>    | <b>YPM</b> | <b>BMM</b> | <b>YPD</b> | <b>YPDN</b> | <b>BMD</b> | <b>BMDN</b> | <b>YPG</b> | <b>BMG</b> |
|--------------------|------------|------------|------------|-------------|------------|-------------|------------|------------|
| <b>X-33</b>        | na         | na         | na         | na          | na         | na          | na         | na         |
|                    |            |            |            |             |            |             |            |            |
| <b>X-33 Y250 1</b> | 1.68E-04   | 1.70E-05   | 1.45E-05   | 7.56E-01    | 7.37E-01   | 7.57E-01    | 2.70E-02   | 7.17E-03   |
| <b>X-33 Y250 2</b> | 5.62E-01   | 4.07E-06   | 4.00E-09   | 9.78E-01    | 1.22E-01   | 1.33E-04    | 2.13E-02   | 4.82E-01   |
| <b>X-33 Y250 3</b> | 4.24E-02   | 2.26E-07   | 5.12E-07   | 8.32E-01    | 2.30E-01   | 3.01E-03    | 9.65E-01   | 1.36E-02   |
| <b>X-33 Y250 4</b> | 4.71E-01   | 1.11E-06   | 7.65E-08   | 3.82E-01    | 8.56E-03   | 3.93E-06    | 1.89E-02   | 1.06E-01   |
|                    |            |            |            |             |            |             |            |            |
| <b>X-33 M250 1</b> | 1.04E-02   | 1.05E-06   | 1.56E-05   | 2.21E-06    | 6.78E-02   | 2.51E-01    | 6.10E-01   | 1.05E-01   |
| <b>X-33 M250 2</b> | 1.18E-02   | 1.22E-06   | 1.25E-04   | 3.93E-01    | 2.86E-04   | 1.52E-01    | 4.61E-03   | 3.92E-05   |
| <b>X-33 M250 3</b> | 5.82E-02   | 6.11E-06   | 1.70E-06   | 1.40E-01    | 4.02E-04   | 4.22E-04    | 3.35E-02   | 6.58E-03   |
| <b>X-33 M250 4</b> | 5.30E-02   | 3.86E-06   | 7.84E-01   | 3.25E-01    | 4.98E-05   | 6.19E-04    | 1.31E-02   | 2.67E-02   |

**Additional Table 3. Growth rate Student's t-test values.** *p*-values of growth rates (as given in Table 1 of the main manuscript) compared to the ancestral strain. A paired two-sided T-test (equal variances) was performed. YPM – YP medium 1 % MeOH; BMM – buffered minimal medium 1 % MeOH; YPD – YP medium 2 % glucose; YPDN – YPD, 500mM NaCl; BMD – buffered minimal medium 2 % glucose; BMDN – BMD 250mM NaCl; YPG – YP medium 2 % glycerol; BMG – buffered minimal medium 2 % glycerol; na (not applicable).

| clone       | viability [%] |      |      |    |      |      |      |
|-------------|---------------|------|------|----|------|------|------|
|             | M1            | M2   | M3   | M4 | M5   | M6   | M7   |
| X33 HSA     | 99.3          | 99.5 | 99.6 | nd | 99.6 | 99.6 | 99.6 |
| Y250 3a HSA | 99.8          | 98.8 | 99.6 | nd | 99.5 | 99.3 | 99.1 |
| M250 1a HSA | 99.7          | 99.7 | 99.7 | nd | 99.7 | 99.6 | 99.4 |
| M250 3b HSA | 99.7          | 99.8 | 99.8 | nd | 99.8 | 99.7 | 99.4 |

**Additional Table 5. Viability during methanol feed phase in bioreactor cultivations.** Viability (%) of *P. pastoris* bioreactor cultivations during the methanol feed (M1-M7). *nd* – not determined.

| clone       | $\text{h g}_{\text{MeOH}}^{-1} \text{g}_{\text{YDM}}^{-1}$ |
|-------------|------------------------------------------------------------|
| X33 HSA     | 0.012 +/- 0.002                                            |
| Y250 3a HSA | 0.018 +/- 0.003                                            |
| M250 1a HSA | 0.012 +/- 0.002                                            |
| M250 3b HSA | 0.010 +/- 0.003                                            |

**Additional Table 6. MeOH consumption during MeOH pulse phases.** The time (h) to consume 1 g MeOH per g biomass is shown. Values represent averages of all pulses +/- SD.

|              | MeOH pulse phase                                      | MeOH constant feed                                    |
|--------------|-------------------------------------------------------|-------------------------------------------------------|
|              | OTR [ $\text{mM h}^{-1} \text{g}_{\text{YDM}}^{-1}$ ] | OTR [ $\text{mM h}^{-1} \text{g}_{\text{YDM}}^{-1}$ ] |
| X33 HSA 7    | 2.4 +/- 0.3                                           | 0.9 +/- 0.2                                           |
| Y2503A HSA 4 | 1.4 +/-0.2                                            | 0.9 +/-0.2                                            |
| M2501a HSA 7 | 1.8 +/- -0.2                                          | 0.8 +/- 0.1                                           |
| M2503b HSA 4 | 1.9 +/-0.2                                            | 0.8 +/- 0.2                                           |

**Additional Table 7.** Oxygen transfer rates (OTR) for each of the four fed batch fermentations during the methanol pulse and constant feed phases. Values represent averages of all pulses and constant feed phases +/- standard deviation.

## Additional Figures

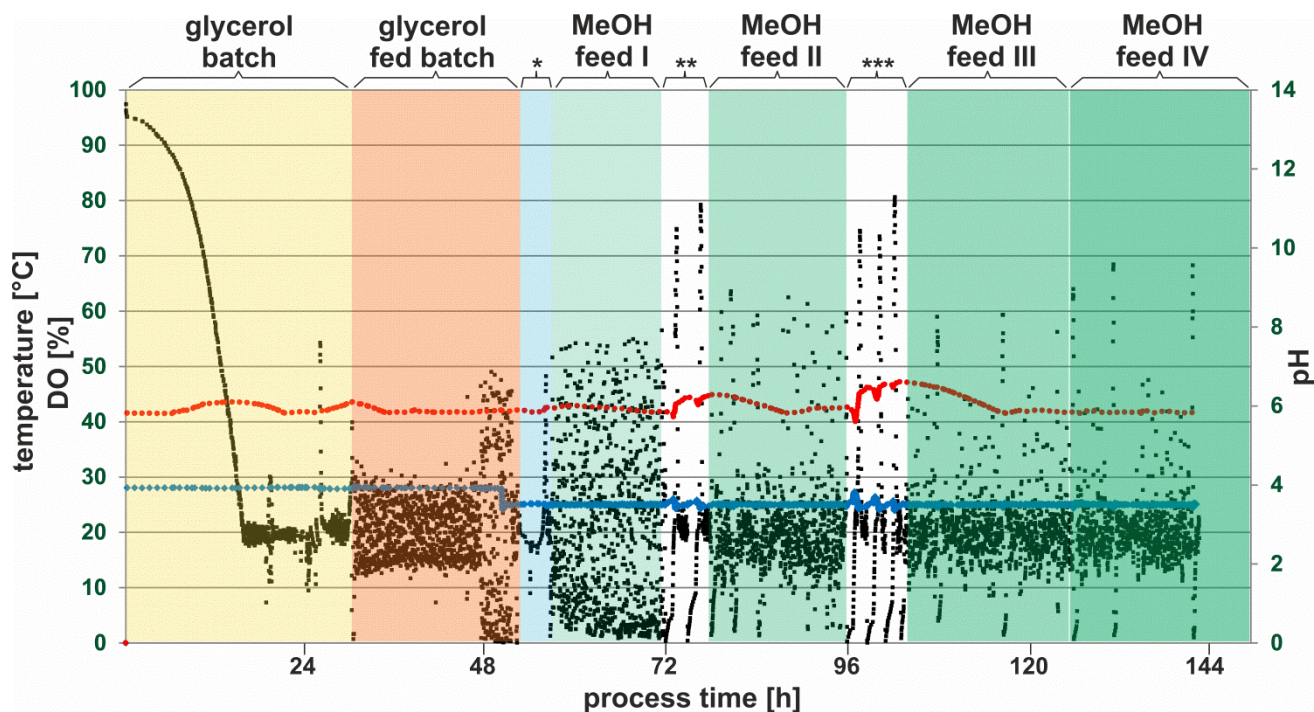

**Additional Figure 1. Overview of the process setup for fed-batch fermentations.** The setup of the MeOH fed batch is shown. Data for the *P. pastoris* X-33 rHSA-expressing clone were used for this exemplary plot (see main manuscript for details). Temperature (blue), dissolved oxygen (DO, black) and pH (red) are shown. Different phases of the process are highlighted. After an initial glycerol batch and fed-batch phase (2.2 – 5.0 g glycerol fed batch medium h<sup>-1</sup>, depending on clone), methanol pulses and constant feed phases were applied. \* MeOH adaptation pulse, 0.5 %; \*\* 1 and 1.25 % MeOH pulses; \*\*\* 1.5, 1.5 and 0.75 % MeOH pulses; MeOH feed I – constant feed 0.5 g h<sup>-1</sup>; MeOH feed II – constant feed 1.0 g h<sup>-1</sup>; MeOH feed III – constant feed 1.5 g h<sup>-1</sup>; MeOH feed IV – constant feed 2.0 g h<sup>-1</sup>.

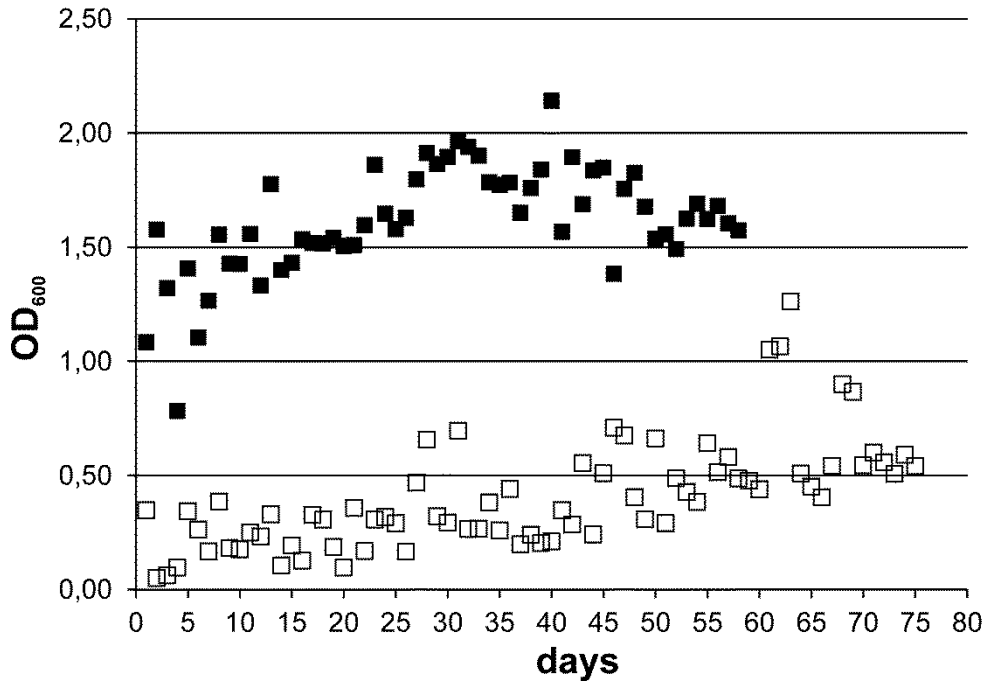

**Additional Figure 2. Daily passages of *P. pastoris* X-33 populations.** Four parallel populations were adapted through daily passages in YPM medium (black squares, 1:20 dilutions) and BMM medium (open squares, 1:10 dilutions used). Data points represent the average OD<sub>600</sub> of all four populations.

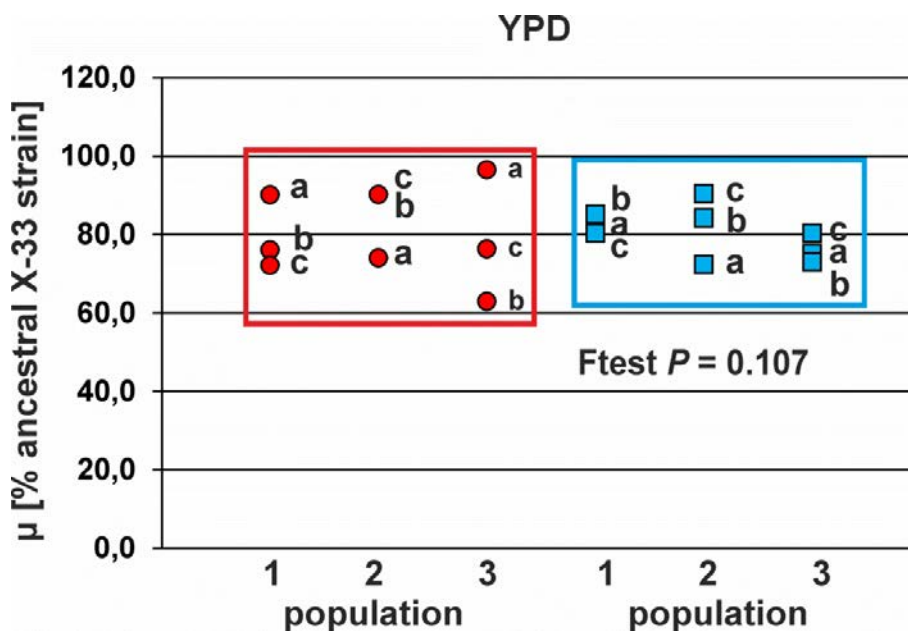

**Additional Figure 3. Single clone growth rates on YPD in deep-well plates.** Three single clones from YPM and BMM-evolved population 1 to 3 were randomly selected and growth rates were compared to the ancestral *P. pastoris* strain. % growth rate relative to the ancestral strain is shown. Number of replicates per single clone,  $n = 2$ .

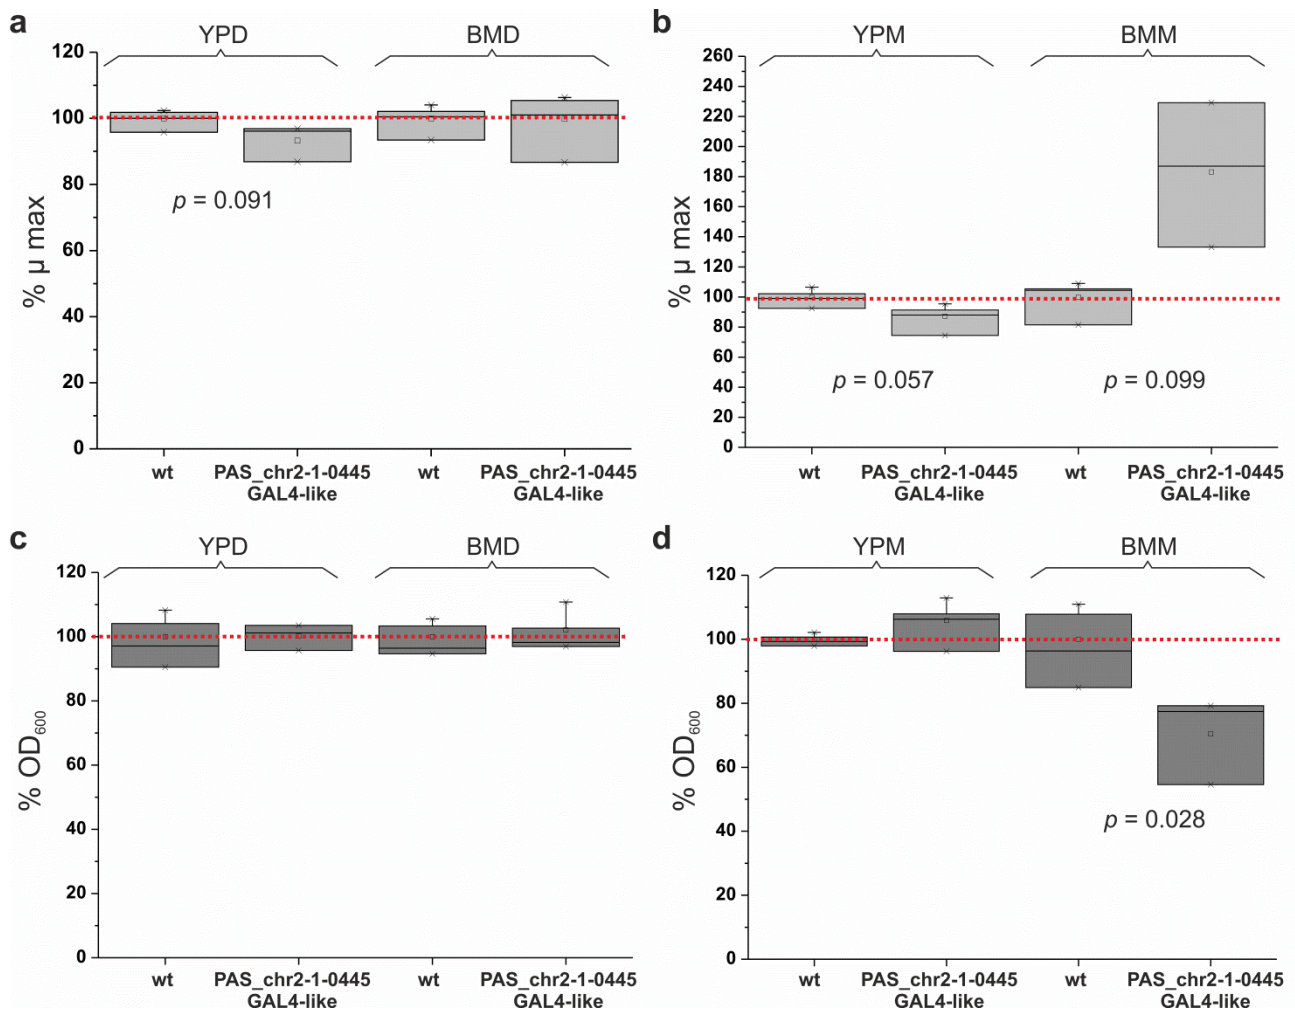

**Additional Figure 4. Effect of PAS\_chr2-0445 overexpression on growth.** The growth of empty vector control (pGAPzB; wt) clones and PAS\_chr2-0445 ORF overexpressing clones was compared in YPD and BMD medium (a,c) and YPM and BMM medium (b,d). Plots a and b show  $\mu_{max}$  with the wt clones set to 100% and plots d and d show final  $OD_{600}$  after 24 hours of growth relative to the vector control. Four individual clones were randomly selected for each strain and analyzed in duplicate.



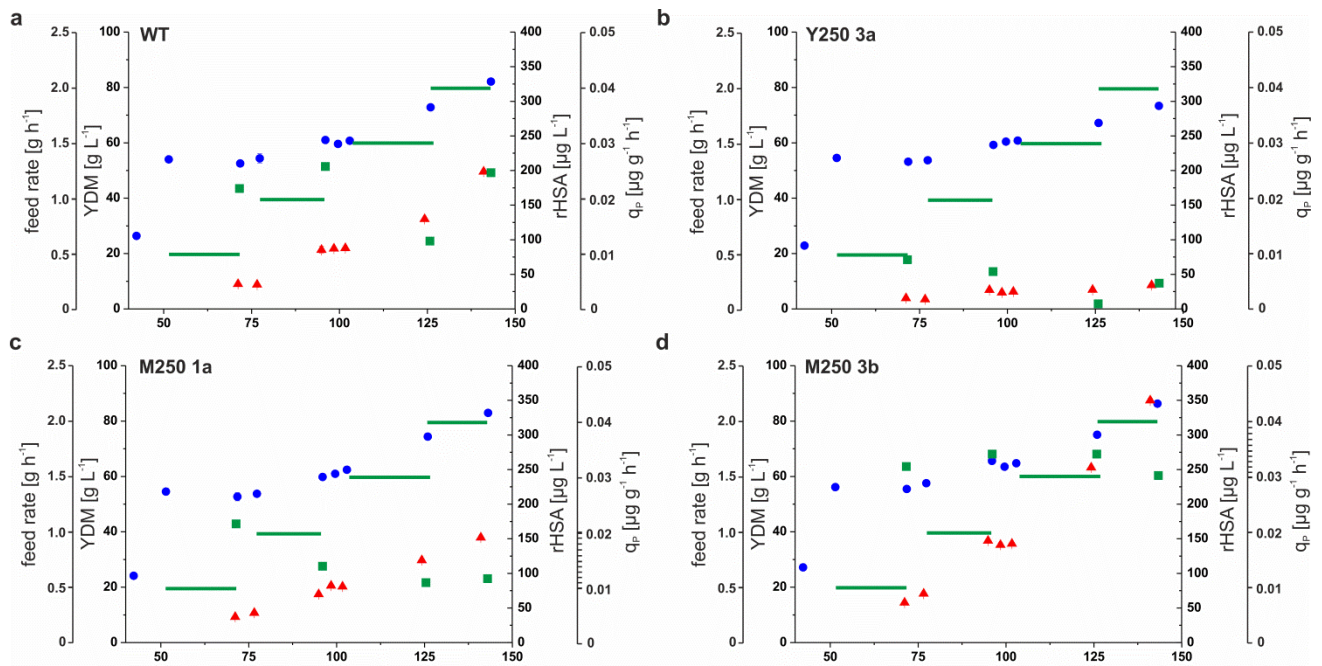

**Additional Figure 5. Bioreactor cultivation profiles of rHSA-expressing X-33 (a) and methanol-adapted clones Y250 3a (b), M250 1a (c) and M250 3b (d); methanol feed rates (green lines) during constant feed phases;  $q_p$  during constant feed phases (green squares); YDM (blue dots) and rHSA titer (red triangles) are shown.**

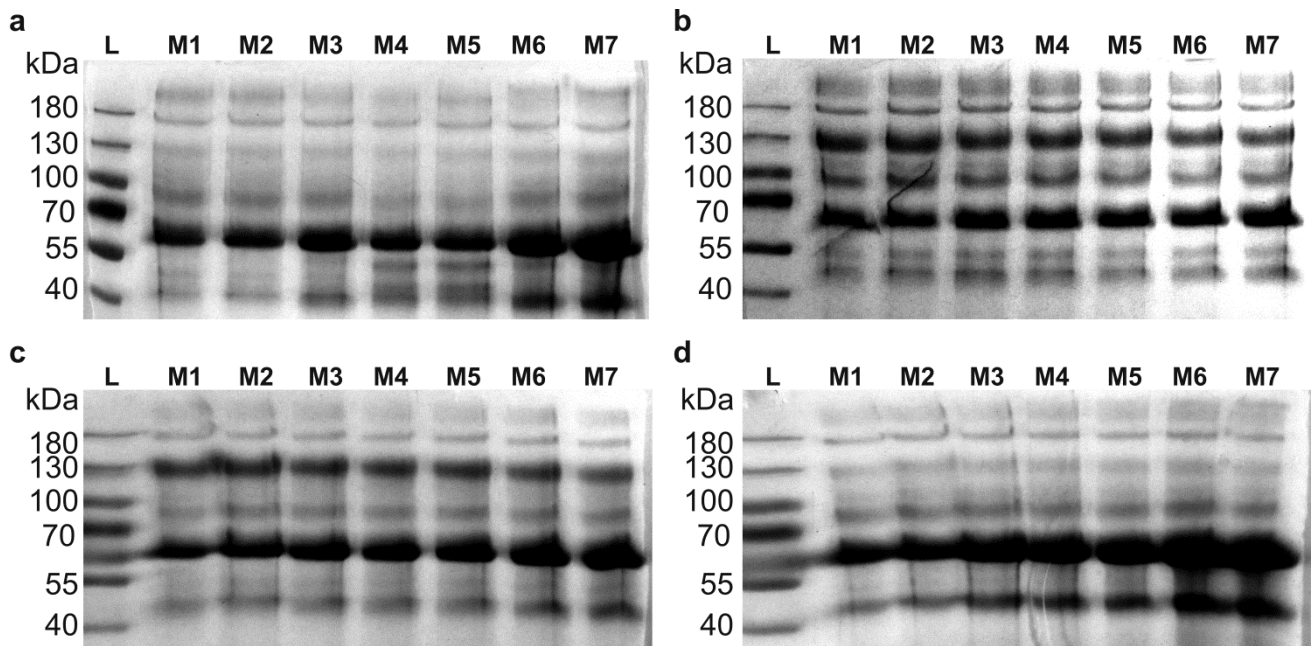

**Additional Figure 6. rHSA in the culture supernatants during fed batch cultivation.** rHSA production was followed throughout the methanol feed phase (samples M1 – M7). 15  $\mu$ L culture supernatant were used per lane and separated on a 12 % polyacrylamide gel by SDS-PAGE, followed by colloidal Coomassie G-250 staining. (A) X-33 rHSA culture (B) Y250 3a rHSA culture (C) M250 1a culture and (D) M250 3b fed batch culture
